# Supplementary material
Source: publisher site journal article supplement (https://www.dovepress.com/article/248570)
Supplement: Supplementary file 1 [file get_supplementary_file.php]

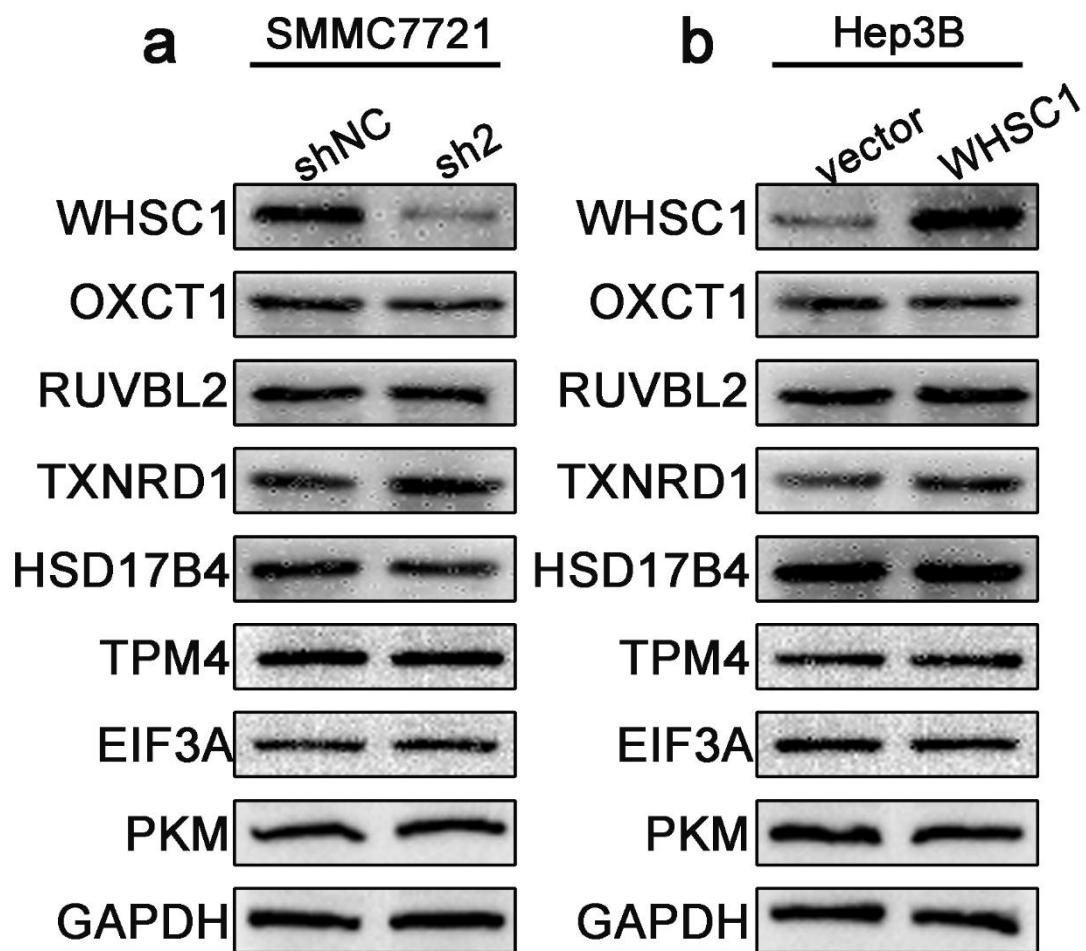

**Figure S1** Interaction of WHSC1 with P4HB. (a) Measurement of candidate interacting proteins for WHSC1 in SMMC7721 cells with western blotting. (b) Measurement of candidate interacting proteins for WHSC1 in Hep3B cells with western blotting.

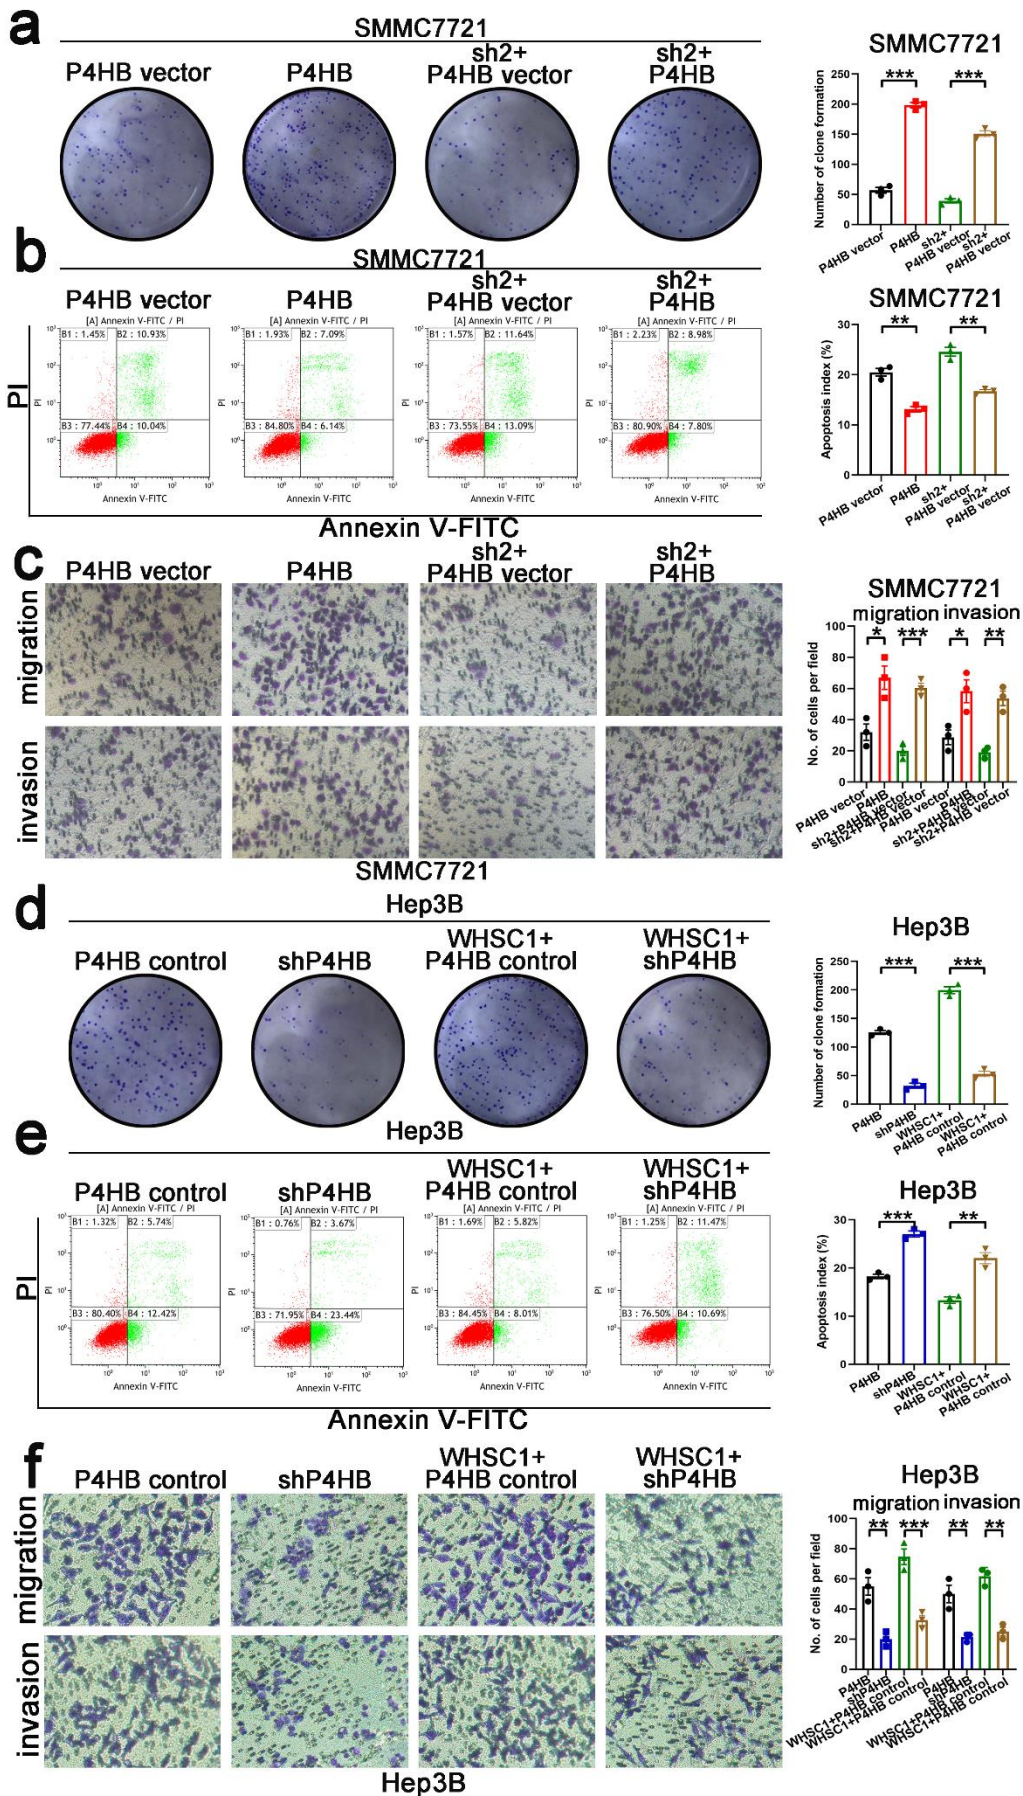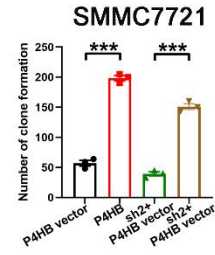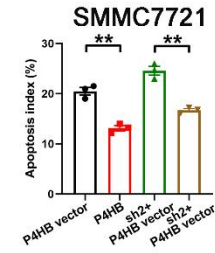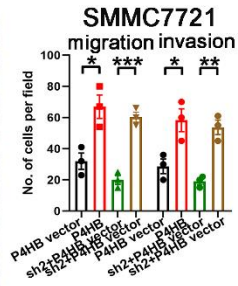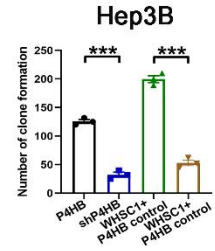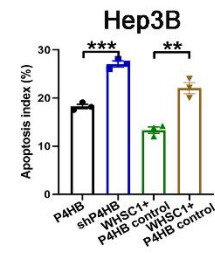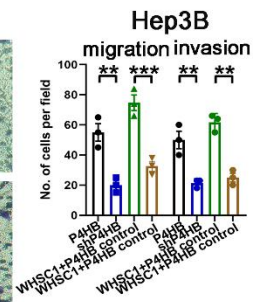

**Figure S2** WHSC1 promoting HCC malignancy through P4HB upregulation. (a) Colony-forming abilities of SMMC7721-P4HB control cells and SMMC7721-shP4HB cells with or without WHSC1 overexpression. (b) Flow cytometric analysis of SMMC7721-P4HB control cells and SMMC7721-shP4HB cells with or without WHSC1 overexpression. (c) Invasive and migratory abilities of SMMC7721-P4HB control cells and SMMC7721-shP4HB cells, with or without WHSC1 overexpression. (d) Colony-forming abilities of Hep3B-P4HB vector cells and Hep3B-P4HB cells with or without WHSC1 knockdown. (e) Flow cytometric analysis of Hep3B-P4HB vector cells and Hep3B-P4HB cells with or without WHSC1 knockdown. (f) Invasive and migratory abilities of Hep3B-P4HB vector cells and Hep3B-P4HB cells with or without WHSC1 knockdown. Data are presented as mean  $\pm$  SEM. \* $P < 0.05$ , \*\* $P < 0.01$ , \*\*\* $P < 0.001$ . P-values were determined using a two tailed t-test.

**a**

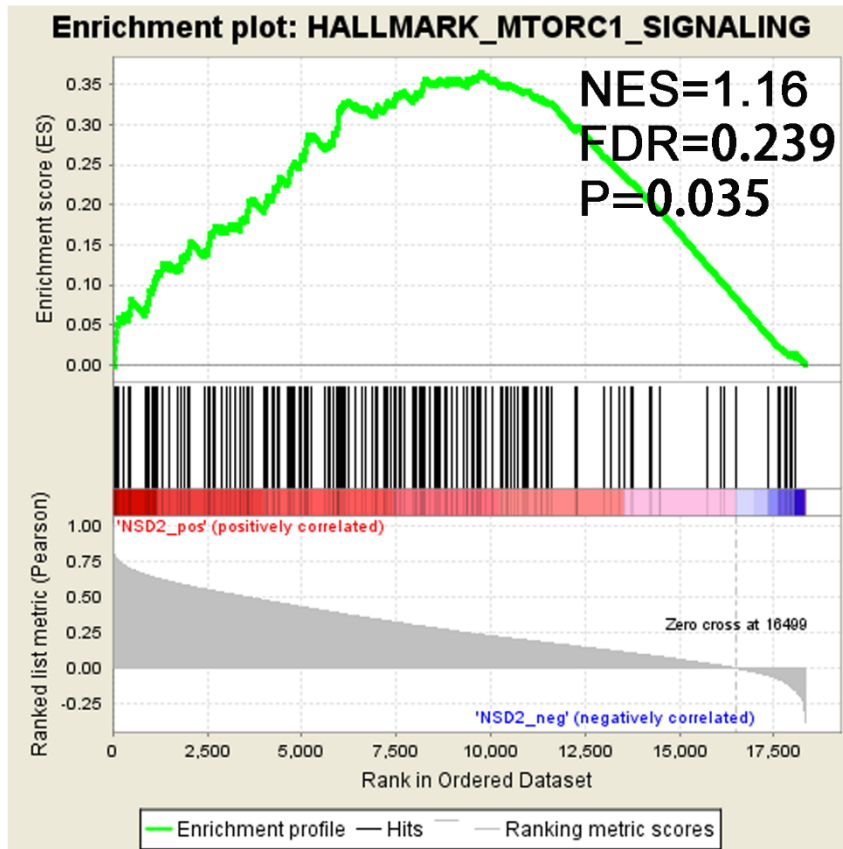

**Figure S3** Positive regulation of mTORC1 signaling by WHSC1. (a) GSEA using data from TCGA to determine the signaling pathways influenced by WHSC1.

**Supplementary Data 1:**

**WHSC1 shRNA Sequence (5'-3') Genn ID: 7468, NM\_001042424.3**

WHSC1 shRNA1: 5'-GCCAAGAGGGACATCAGAAAG-3'

WHSC1 shRNA2: 5'-GCACTTCCAGGATATCATTTG-3'

WHSC1 shRNA3: 5'-GCCTCCAATTGCAGTGGATTC-3'

**P4HB shRNA Sequence (5'-3') Genn ID: 5034, NM\_000918.4**

P4HB shRNA1: 5'-GCCATCGATGACATACCATTT-3'

P4HB shRNA2: 5'-GCTTGTTGGGAAGAACTTTGA-3'

P4HB shRNA3: 5'-GGAAGACGATGATCAGAAAGC-3'

**The sequences of primers used**

WHSC1-F CCCACCATAACAAGCACAT

WHSC1-R TCAGACACTCCGAATCAAA

**Supplementary Data 2:**

| First protein | Gene name | Description                                                     | Peptides | Sequence coverage [%] | Unique sequence coverage [%] | Mol. weight [kDa] | Sequence length | iBAQ treat |
|---------------|-----------|-----------------------------------------------------------------|----------|-----------------------|------------------------------|-------------------|-----------------|------------|
| P55809        | OXCT1     | Succinyl-CoA:3-ketoacid coenzyme A transferase 1, mitochondrial | 9        | 28.7                  | 28.7                         | 56.157            | 520             | 492250     |
| Q9Y230        | RUVBL2    | RuvB-like 2                                                     | 8        | 20.5                  | 20.5                         | 51.156            | 463             | 935980     |
| E9PIR7        | TXNRD1    | Thioredoxin reductase 1, cytoplasmic                            | 6        | 19.3                  | 19.3                         | 53.166            | 482             | 525730     |
| E7ER27        | HSD17B4   | Peroxisomal multifunctional enzyme type 2                       | 5        | 12.8                  | 4.4                          | 53.928            | 500             | 394130     |
| I3L514        | P4HB      | Protein disulfide-isomerase                                     | 4        | 27.4                  | 8.5                          | 11.565            | 106             | 420900     |
| P14618        | PKM       | Pyruvate kinase PKM                                             | 37       | 71.2                  | 71.2                         | 57.936            | 531             | 8544300    |
| Q14152        | EIF3A     | Eukaryotic translation initiation factor 3 subunit A            | 8        | 6.3                   | 6.3                          | 166.57            | 1382            | 156600     |
| P67936        | TPM4      | Tropomyosin alpha-4 chain                                       | 21       | 56                    | 30.6                         | 28.521            | 248             | 3174800    |
